RESEARCH ARTICLE

# Distinct brain pathways link depressive symptoms due to respiratory dysfunction and reduced physical activity in patients with chronic obstructive pulmonary disease: A single-center observational pilot study

Shunsuke Sakakura<sup>1,2†</sup>, Motoyasu Honma<sup>1†\*</sup>, Yuri Masaoka<sup>1</sup>, Ryo Manabe<sup>3</sup>, Kentaro Okuda<sup>4,5</sup>, Masaki Yoshida<sup>6</sup>, Akira Yoshikawa<sup>7</sup>, Misako Matsui<sup>1</sup>, Daiki Shoji<sup>8</sup>, Miku Kosuge<sup>2</sup>, Shota Kosuge<sup>8</sup>, Kenta Miyo<sup>1,2</sup>, Masahiro Ida<sup>9,10</sup>, Fumihiro Yamaguchi<sup>2</sup>, Takuya Yokoe<sup>2</sup>, Masahiko Izumizaki<sup>1</sup>

**1** Department of Physiology, Showa Medical University School of Medicine, Tokyo, Japan, **2** Department of Respiratory Medicine, Showa Medical University Fujigaoka Hospital, Yokohama, Japan, **3** Department of Medicine, Division of Respiratory Medicine and Allergology, Showa Medical University School of Medicine, Tokyo, Japan, **4** Department of Medicine, Tokyo Metropolitan Ebara Hospital, Tokyo, Japan, **5** Home Care Support Clinic Kaede no Kaze Kawasaki Chuo, Kawasaki, Japan, **6** Department of Orthoptics and Visual Sciences, International University of Health and Welfare, Tokyo, Japan, **7** Division of Health Science Education, Showa Medical University School of Nursing and Rehabilitation Sciences, Yokohama, Japan, **8** Department of Neurology, Showa Medical University School of Medicine, Tokyo, Japan, **9** Department of Radiology, Stroke Center, Tokyo Metropolitan Ebara Hospital, Tokyo, Japan, **10** Department of Radiology, National Hospital Organization Mito Medical Center, Ibaraki, Japan

† These authors share co-first authorship on this work.

\* [mhonma@med.showa-u.ac.jp](mailto:mhonma@med.showa-u.ac.jp)

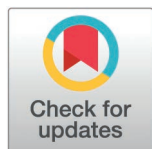

## OPEN ACCESS

**Citation:** Sakakura S, Honma M, Masaoka Y, Manabe R, Okuda K, Yoshida M, et al. (2026) Distinct brain pathways link depressive symptoms due to respiratory dysfunction and reduced physical activity in patients with chronic obstructive pulmonary disease: A single-center observational pilot study. PLoS One 21(1): e0340067. <https://doi.org/10.1371/journal.pone.0340067>

**Editor:** Rei Akaishi, RIKEN CBS: RIKEN Noshinkei Kagaku Kenkyu Center, JAPAN

**Received:** September 3, 2025

**Accepted:** December 16, 2025

**Published:** January 28, 2026

**Copyright:** © 2026 Sakakura et al. This is an open access article distributed under the terms of the [Creative Commons Attribution License](https://creativecommons.org/licenses/by/4.0/), which permits unrestricted use, distribution, and reproduction in any medium, provided the original author and source are credited.

**Data availability statement:** The dataset can be obtained from the link (Mendeley Data, DOI: [10.17632/nb2sty7x9v.1](https://doi.org/10.17632/nb2sty7x9v.1)). Raw data from electrophysiological and behavioral data

## Abstract

Mental health issues, such as depression, are increasingly recognized as critical comorbidities in chronic obstructive pulmonary disease (COPD). While analyses of individual domains or pairwise relationships among airflow obstruction severity, brain morphological features, and mental health conditions in COPD have provided valuable insights into their direct associations, a more integrative approach may offer additional mechanistic understanding. This study aimed to clarify potential mediators in multiple brain regions between airflow obstruction and depressive tendencies in patients with COPD. We analyzed 19 patients with COPD and 23 age-matched healthy controls. Path analysis was used to evaluate the relationships among respiratory indices, regional brain volumes, and depressive symptoms. The path analysis revealed two potential pathways to depressive symptoms in the COPD group. One was a pulmonary pathway, involving forced expiratory volume in one second (%FEV<sub>1</sub>) and the genu of the corpus callosum ( $\beta = 0.503$ ,  $p < 0.05$ ) leading to depressive symptoms ( $\beta = 0.532$ ,  $p < 0.05$ ). The other was a behavioral pathway, in which physical activity ( $\beta = 0.444$ ,  $p < 0.05$ ) affected the right postcentral gyrus ( $\beta = -0.286$ ,  $p < 0.05$ ) and, in turn, depressive symptoms. No significant group differences were

are available from the Ethics Committee of Tokyo Metropolitan Ebara Hospital, Tokyo Metropolitan Hospital Organization upon reasonable request (4-5-10 Higashi-Yukigaya, Ota-ku, Tokyo 145-0065, Japan, Tokyo Metropolitan Ebara Hospital, Tel: +81-3-5734-8000, Email: [eb\\_iryouservice@tmhp.jp](mailto:eb_iryouservice@tmhp.jp)).

**Funding:** "This work was supported by JSPS KAKENHI Grant Numbers 24K02648 and 18K08186".

**Competing interests:** The authors have declared that no competing interests exist.

observed in other examined regions, including the posterior cingulate, hippocampus, hypothalamus, insula, or other corpus callosum subregions, nor in depression or anxiety scores. The model demonstrated a good fit in the COPD group (GFI=0.876), whereas in controls, the model showed poor fit and no significant relationships (GFI=0.784). These preliminary findings suggest potential brain pathways linking air-flow obstruction, physical activity, and depressive symptoms in COPD, which warrant confirmation in larger, longitudinal studies.

## Introduction

Chronic obstructive pulmonary disease (COPD) is a heterogeneous lung condition characterized by persistent, often progressive airflow obstruction resulting from abnormalities in both the airways and alveoli (Global Strategy for the Prevention, Diagnosis and Management of COPD: 2025 Report (GOLD)) [1]. The disease is primarily triggered by chronic exposure to toxic substances, particularly cigarette smoking [2] and air pollutants [3], and presents with respiratory symptoms such as chronic dyspnea and productive cough.

COPD is a systemic disease with inflammatory features that extend beyond the lungs. It is commonly associated with comorbidities, including ischemic heart disease, heart failure, osteoporosis, normocytic anemia, lung cancer, depression, and diabetes, all of which contribute to poorer patient outcomes [4]. Although often under-recognized, psychiatric disorders, which include depression and anxiety, are highly prevalent among patients with COPD [5]. A large matched cohort study reported that patients with COPD have a 42% higher risk of developing incident depression compared to matched controls without COPD, with the risk being particularly elevated in those experiencing more severe dyspnea [6]. These mental health conditions are significantly associated with worsened health status, increased risk of exacerbations, and higher rates of emergency hospital admissions in patients with COPD [7]. According to the GOLD Report [1], depression is among the three most frequently overlooked comorbidities in COPD, along with heart failure and lung cancer, underscoring the need for systematic mental health screening in comprehensive COPD management [1] (p.124).

While COPD management incorporates comprehensive assessment tools such as the GOLD ABE classification [1], forced expiratory volume in one second (FEV<sub>1</sub>) remains a fundamental physiological marker used to objectively quantify the severity of airflow obstruction [1] (p.40). Neuroimaging studies have demonstrated significant associations between the severity of airflow obstruction and structural changes in the brain. For example, one study demonstrated that greater airflow obstruction is linked to widespread brain alterations [8], including reductions in cerebral white matter volume and microstructural abnormalities associated with poorer mood states. These findings suggest that anxiety and depression in COPD may occur secondary to white matter damage. Another investigation found that patients with moderate airflow obstruction, as measured by FEV<sub>1</sub>, exhibited reduced gray matter density in frontal

regions and compromised white matter integrity, evidenced by increased diffusivity in major tracts, particularly the corpus callosum and corona radiata, with changes becoming more pronounced in cases of severe obstruction [9]. A case-control study reported reduced gray matter in several key regions, including the midcingulate cortex, anterior cingulate cortex, hippocampus, and amygdala, in patients with COPD compared to healthy controls. Notably, a mediation study revealed a significant indirect effect: patients with longer disease duration exhibited a greater fear of physical activity, which was associated with more pronounced volume reduction in the anterior cingulate cortex [10]. This mediation approach highlights how COPD may affect mental health through structural brain changes, rather than via isolated correlations.

Although FEV<sub>1</sub> alone does not fully capture the complex effects of COPD on quality of life, its robust association with brain structure offers an opportunity to investigate the neurobiological pathways linking COPD pathophysiology to psychological symptoms. Building on these findings, we hypothesize that structural alterations in specific brain regions mediate the relationship between the airflow obstruction severity and depression or anxiety symptoms in patients with COPD. To test this hypothesis, we conducted a path analysis focusing on regions of interest (ROI) previously implicated in COPD-related brain changes, including the cingulate cortex, hippocampus, amygdala, postcentral gyrus, insula cortex, and corpus callosum [11–15]. These regions are crucial for emotional processing and stress regulation, and their structural abnormalities may mediate the association between the airflow limitation and depression or anxiety symptoms.

## Materials and methods

### Ethics statement

This study was approved by the Ethics Committee of Tokyo Metropolitan Ebara Hospital, Tokyo Metropolitan Hospital Organization (trial identifier number: 2811) and conducted in accordance with the Declaration of Helsinki. The study protocol was prospectively registered in the University Hospital Medical Information Network (UMIN) registry. (UMIN-CTR; trial ID: UMIN000054768). Written informed consent was obtained from all participants. The authors had access to identifying participant information during and after data collection.

### Participants

This single-center cohort study was conducted at Tokyo Metropolitan Ebara Hospital. Between 1 November 2016–12 January 2017, 22 patients with COPD were recruited. Of these, 19 patients (18 males) were included in the analysis; three were excluded due to missing data (no completed questionnaires) (Fig 1). A total of 23 age-matched healthy controls (16 males) were selected from a previously published study [16]; these individuals underwent structural magnetic resonance imaging (MRI) using the same MRI acquisition protocol, image processing, and volume segmentations. Five control subjects were excluded from the path analysis due to missing respiratory data.

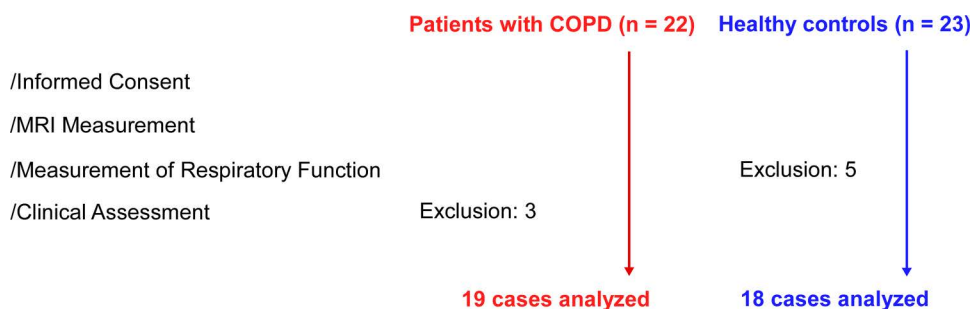

**Fig 1. Patient flow diagram.** Three patients with COPD did not complete the questionnaires for the clinical assessments, and 5 healthy controls did not complete the measurement of respiratory function. The 19 patients and 18 healthy controls underwent MRI acquisition, and respiratory function testing, and clinical assessments. Background factors (e.g., BMI, smoking history) were obtained prior to the clinical evaluations.

<https://doi.org/10.1371/journal.pone.0340067.g001>

## Measurement of respiratory function

All participants underwent standard spirometry to assess parameters, including forced vital capacity (FVC) and FEV<sub>1</sub>. The percent predicted FEV<sub>1</sub> (%FEV<sub>1</sub>) was calculated as the ratio of measured FEV<sub>1</sub> to the predicted FEV<sub>1</sub>, based on age, sex, and height. Spirometry was performed without additional odilator administration; however, patients with COPD remained on their prescribed medications. Healthy controls followed the same spirometry protocol, also without bronchodilator use.

## Assessments

Data on age, body mass index (BMI), and smoking history of the participants were collected. Physical activity was evaluated using the International Physical Activity Questionnaire (IPAQ), which measures the number of days and duration of moderate-and high-intensity physical activity during a week [17]. COPD severity and disease duration were recorded, and the COPD Assessment Test (CAT) was used to evaluate disease impact [18]. Anxiety and depression were assessed using the Hospital Anxiety and Depression Scale (HADS) [19], which comprises 14 items (7 for depression and 7 for anxiety). Each item is scored from 0 to 3, with subscale scores calculated as the sum of the item scores; higher scores indicate poorer mental health.

## MRI acquisition

Structural MRI scans were acquired at Ebara Hospital using a 3.0-Tesla Siemens Trio system (Erlangen, Germany) with standard head coil settings. T1-weighted anatomical images were acquired using the following parameters: repetition time = 2250 ms, echo time = 3.06 ms, flip angle = 9°, inversion time = 1000 ms, field of view = 256 × 256 mm, matrix size = 256 × 256, and voxel size = 1 × 1 × 1 mm. High-resolution anatomical imaging was performed using a magnetization-prepared rapid gradient echo (MPRAGE) sequence.

## Image processing

Image processing was conducted using FreeSurfer version 6.0 (<http://surfer.nmr.mgh.harvard.edu>) [20]. The pipeline included motion correction, removal of non-brain tissue, intensity normalization, affine registration to Montreal Neurological Institute (MNI) space, and Talairach transformation. Volumetric segmentation [21], cortical surface reconstruction [22–24], and parcellation [25–27] were performed automatically using the recon-all script. Gray matter volumes were defined based on the Desikan-Killiany brain atlas [26], and all boundaries were visually verified by two trained neurologists using FreeView following affine registration.

Each regional brain volume was adjusted relative to total intracranial volume (ICV) to minimize the effect of head-size differences across individuals [28]. The ratio-corrected volumes were calculated as the ratio of regional brain volume to the ICV. The residual method applied the following correction (1):

$$CV = V - S (ICV - ICV_{mean}) \quad (1)$$

CV is the corrected regional brain volume, V is the original volume, S is the slope of the linear regression of V on ICV, ICV is the intracranial volume for a particular participant, and ICV<sub>mean</sub> is the mean ICV across participants.

## Statistical analysis

Unpaired t-test were used to assess differences between the COPD and control groups in age, BMI, educational history, smoking history, %FEV<sub>1</sub>, and volumes of the left and right posterior cingulate, hippocampus, hypothalamus, insula, post-central gyrus, and body/ampulla/genu of the corpus callosum, as well as depression, and anxiety scores. All tests were two-tailed. Quantitative results are summarized as the mean together with the standard error (SEM). SPSS version 26

was utilized for the analysis. Path analysis was conducted using AMOS version 27.0. Three sets variables were included: (1) respiratory function indices (activity level, smoking history, disease duration, CAT, and %FEV<sub>1</sub>), (2) regional brain volumes (left/right of posterior cingulate, hippocampus, hypothalamus, insula, postcentral, and body/ampulla/genu of corpus callosum), and (3) psychological measures (depression and anxiety). Path analysis was performed separately for each group. The goodness of fit index (GFI) was calculated to assess model fit.

## Results

The basic characteristics of the participants, respiratory function measures, regional brain volume, and depression/anxiety scores are summarized in [Table 1](#). Unpaired t-test revealed no significant differences between the groups in age, BMI, years of education, or physical activity. However, a significant group difference was observed in smoking history ( $t_{35} = 3.3324$ ,  $p = 0.002$ ). The %FEV<sub>1</sub> was also significantly lower in COPD group compared to controls ( $t_{35} = 4.622$ ,  $p < 0.0001$ ). No significant group differences were found in volumes of the posterior cingulate, hippocampus, hypothalamus, and insula (all  $p > 0.300$ ). Similarly, the body, ampulla, and genu of the corpus callosum did not differ significantly between groups (all  $p > 0.05$ ). Depression and anxiety scores on the HADS also showed no significant differences between the two groups ( $p > 0.600$ ).

For the path analysis, we constructed a three-layer model: (1) respiratory function-related indices, (2) regional volumes, and (3) assessments of depressive and anxiety tendencies. All full models, including all paths between these layers, were tested and then refined by removing non-significant paths ([Figs 2](#) and [S1](#)). Path analyses were conducted separately for each group. In the COPD group, the final model demonstrated the best goodness-of-fit ( $X^2(6) = 5.733$ ,  $p = 0.454$ , GFI = 0.904, Bollen-Stine bootstrap  $p = 0.465$ ). The endogenous variables were connected via single-headed arrows, representing standardized regression weights ( $\beta$ ). In this model, the %FEV<sub>1</sub> had a direct effect on the genu of the corpus callosum ( $\beta = 0.503$ ,  $p < 0.01$ ), and physical activity directly impacted the right postcentral gyrus ( $\beta = 0.367$ ,  $p < 0.05$ ). Both the genu of the corpus callosum ( $\beta = -0.521$ ,  $p < 0.05$ ) and right postcentral gyrus ( $\beta = -0.257$ ,  $p < 0.05$ ) showed a direct effect on depression score. In contrast, the model demonstrated poor fit in the healthy control group ( $X^2(6) = 6.517$ ,  $p = 0.368$ , GFI = 0.784, Bollen-Stine bootstrap  $p = 0.515$ ).

## Discussion

The path analysis suggests a model consisting of two distinct pathways leading to depressive symptoms in the COPD group. The first is a pulmonary pathway, in which lower %FEV<sub>1</sub> is associated with a smaller volume of the genu of the corpus callosum, which in turn is linked to greater depressive symptoms. The second is a behavioral pathway, in which reduced physical activity is associated with a smaller right postcentral gyrus, which likewise shows a significant relationship with depressive symptoms. Notably, the same model demonstrated a poor goodness-of-fit in the healthy control group, suggesting that these relationships are specific to the COPD population.

Although the mean depression scores did not differ significantly between the COPD and control groups, we modeled depressive symptoms as the primary outcome to examine within-group associations among respiratory function, brain structure, and mood. This analytical focus was grounded in the rationale that subthreshold depressive symptoms—even when clinical group differences are absent—may nonetheless reflect meaningful neural mechanisms and vulnerability to mood disturbances. Previous studies have similarly reported that such subtle affective variations can be linked to structural and functional brain alterations in chronic medical conditions, supporting the importance of exploring these relationships in COPD. While group-level differences in depressive symptoms or regional brain volumes were not observed, the path analysis was specifically designed to identify latent brain-behavior relationships within the COPD group. This approach provides mechanistic insight into how subclinical mood variations may arise from underlying physiological and neural alterations, even in the absence of overt clinical differences. Modeling these within-group pathways allows for the detection of continuous, disease-related changes and offers a framework for understanding the early or subthreshold



**Table 1. Participants' characteristics: Demographics, clinical, neuroimaging, and psychiatry measures.**

|                                        |         | Patients |       | Controls |       | p value  |
|----------------------------------------|---------|----------|-------|----------|-------|----------|
|                                        |         | Average  | S.D.  | Average  | S.D.  |          |
| Age                                    |         | 73.05    | 5.85  | 74.46    | 4.93  | 0.397    |
| BMI                                    |         | 23.21    | 3.76  | 23.31    | 2.00  | 0.907    |
| Education history (year)               |         | 12.68    | 1.89  | 14.17    | 2.72  | 0.062    |
| Activity                               |         | 207      | 216   | 132      | 117   | 0.203    |
| Smoking history                        |         | 1.63     | 0.50  | 2.40     | 0.75  | 0.007    |
| Duration of disease (year)             |         | 4.29     | 4.81  | –        | –     | –        |
| CAT                                    |         | 15.05    | 6.22  | –        | –     | –        |
| %FEV <sub>1</sub> (%)                  |         | 66.69    | 20.97 | 95.19    | 16.07 | < 0.0001 |
| Posterior cingulate (mm <sup>3</sup> ) |         |          |       |          |       |          |
|                                        | Left    | 3103     | 376   | 3205     | 369   | 0.383    |
|                                        | Right   | 2950     | 525   | 2914     | 373   | 0.796    |
| Hippocampus (mm <sup>3</sup> )         |         |          |       |          |       |          |
|                                        | Left    | 3560     | 295   | 3500     | 367   | 0.565    |
|                                        | Right   | 3687     | 293   | 3710     | 458   | 0.853    |
| Amygdala (mm <sup>3</sup> )            |         |          |       |          |       |          |
|                                        | Left    | 1317     | 185   | 1371     | 217   | 0.407    |
|                                        | Right   | 1537     | 147   | 1518     | 229   | 0.767    |
| Hypothalamus (mm <sup>3</sup> )        |         |          |       |          |       |          |
|                                        | Left    | 5843     | 449   | 5783     | 445   | 0.669    |
|                                        | Right   | 5874     | 409   | 5758     | 415   | 0.373    |
| Insula (mm <sup>3</sup> )              |         |          |       |          |       |          |
|                                        | Left    | 5570     | 481   | 5538     | 506   | 0.838    |
|                                        | Right   | 5839     | 413   | 5811     | 386   | 0.823    |
| Postcentral (mm <sup>3</sup> )         |         |          |       |          |       |          |
|                                        | Left    | 9309     | 1089  | 9694     | 1133  | 0.300    |
|                                        | Right   | 8766     | 1325  | 9264     | 1254  | 0.249    |
| Corpus callosum (mm <sup>3</sup> )     |         |          |       |          |       |          |
|                                        | Body    | 443      | 59    | 414      | 133   | 0.839    |
|                                        | Ampulla | 1013     | 103   | 891      | 159   | 0.050    |
|                                        | Genu    | 845      | 135   | 773      | 123   | 0.139    |
| Depression                             |         | 3.00     | 2.89  | 3.39     | 2.62  | 0.671    |
| Anxiety                                |         | 3.58     | 2.29  | 3.28     | 2.26  | 0.708    |

BMI: Body Mass Index, CAT: COPD assessment test, %FEV<sub>1</sub>: percent predicted Forced Expiratory Volume in one second. Smoking history was examined using a 3-point Likert method 1 = current smoker, 2 = former smoker in the past, 3 = never smoker.

<https://doi.org/10.1371/journal.pone.0340067.t001>

manifestations of neuropsychiatric symptoms in COPD. Taken together, these findings suggest that the risk of depression in COPD may be closely linked to structural alterations in the corpus callosum and postcentral gyrus, both of which appear to be affected by airflow obstruction and physical inactivity.

The relationship between COPD and structural brain alterations has been well documented. Prior studies have provided crucial evidence of progressive structural impairments in both gray matter and white matter as airflow obstruction worsens, with significant white matter changes in the corpus callosum and cingulum correlating with cognitive deficits [9]. Further research reported that axial diffusivity reductions were most pronounced in the corpus callosum, corticospinal tracts, and midbrain among patients with COPD [29]. Our findings extend these observations by demonstrating a specific

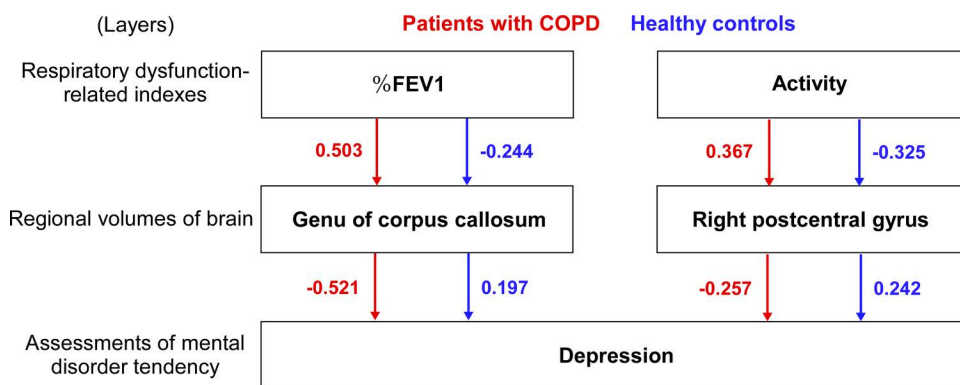

**Fig 2. Path analysis model showing two possible pathways to depressive symptoms.** One pathway involves %FEV<sub>1</sub>, the genu of the corpus callosum, and depressive symptoms. The other pathway involves physical activity, the right postcentral gyrus, and depressive symptoms. Red arrows and values indicate standardized regression weights for the COPD patient group, while blue arrows and values represent those for the healthy control group.

<https://doi.org/10.1371/journal.pone.0340067.g002>

association between reduced %FEV<sub>1</sub> and genu atrophy, indicating that this region may be particularly vulnerable. In addition, regular physical activity has been shown to exert a favorable effect on various cerebral regions. One study comparing athletes and non-athletes found that athletes had greater volumes in the right frontal lobe, left corticospinal tract, and right postcentral gyrus [30]. Another study comparing individuals in physically demanding versus less physically demanding occupations reported greater cortical thickness in the right postcentral gyrus among the former group [31]. These findings suggest a strong association between activity and postcentral gyrus volume, aligning with our current results.

The mechanistic link between respiratory dysfunction and brain structural changes likely involves multiple pathways. A previous study suggested that white matter abnormalities in patients with COPD are largely independent of smoking history and cerebrovascular comorbidities, implicating hypoxemia and systemic inflammation as primary drivers [32]. This is consistent with findings from patients with obstructive sleep apnea, a condition marked by intermittent hypoxia, who also show structural deformities in the genu and rostral body of the corpus callosum [33]. Another study reported that improved working memory after CPAP (continuous positive airway pressure) therapy was significantly associated with decreased deactivation in the posterior cingulate and postcentral gyrus, while increased sleepiness was linked to activation in the left and right medial frontal gyrus [34]. Our findings support these results by demonstrating that structural alterations in the corpus callosum and postcentral gyrus are integral to COPD pathophysiology.

The clinical relevance of corpus callosum damage, particularly in the genu, extends beyond COPD. Structural disruption in this region has been linked to cognitive and emotional impairments, with the genu being critical for interhemispheric communication and higher-order cognitive processes [35]. In bipolar disorder, reduced fractional anisotropy in the corpus callosum has been associated with executive dysfunction and impaired emotional regulation [36], while disturbances in the genu have been implicated in alexithymia [37]. Case reports of corpus callosum infarction involving the genu have demonstrated associations with severe memory deficits and impaired emotional processing [38], consistent with our findings on the relationship between genu integrity and depressive symptoms. Additionally, the postcentral gyrus has been strongly associated with psychiatric disorders, including depression. A recent study reported reduced structural and functional connectivity in the parietal lobe among patients with major depressive disorder (MDD) [39]. Another investigation utilizing magnetization transfer imaging found increased gray matter volume in the right postcentral gyrus in patients with MDD [40]. These findings highlight the postcentral gyrus as a region implicated in depression symptoms, further supporting our model.

Recent insights into the lung–brain axis further illuminate these connections. A study showed that chronic pulmonary diseases, including COPD, are associated with neuroinflammatory and oxidative stress, which disproportionately

affect white matter integrity [41]. Consistent with this notion, a recent review highlighted that COPD-related neuroinflammatory processes contribute to both structural brain alterations and comorbid depression, underscoring the bidirectional interaction between pulmonary and neuropsychiatric health [42]. The present study delineates a specific mechanistic link within this broader framework: reductions in %FEV<sub>1</sub> and physical activity lead to atrophy in the genu of the corpus callosum and postcentral gyrus, which in turn are associated with depressive tendencies. This indicates that these brain regions are not only sites of structural damage but also critical mediators of broader network dysfunction in COPD.

This study has limitations. First, the relatively small sample size (19 patients with COPD and 23 healthy controls) may limit the robustness of the path analysis and increase the risk of overfitting. The findings should therefore be interpreted as exploratory and preliminary. While the model demonstrated an acceptable goodness of fit, the relationships identified may not be stable or fully generalizable to broader COPD populations. Small samples can lead to biased estimates and unstable structural equation model solutions, highlighting the need for replication in larger, multicenter cohorts [43]. Second, although our results revealed a significant association between right postcentral gyrus volume and depressive symptoms, the directionality and biological meaning of this relationship remain to be clarified. The postcentral gyrus is implicated in somatosensory–affective integration, and its observed structural alterations may represent compensatory or secondary changes rather than a primary cause of depressive symptoms. Previous studies have demonstrated that cortical thinning is associated with frailty and physical inactivity [44], suggesting that the changes observed in the corpus callosum and postcentral gyrus in our study represent part of a broader neuropsychiatric phenotype in COPD. The involvement of somatosensory cortices in affective processing has been highlighted in recent neuroimaging reviews [45,46], supporting the notion that sensory–affective coupling may contribute to mood dysregulation. Third, potential confounding factors should be considered when interpreting the present findings. Although participants with major psychiatric or neurological disorders were excluded, we did not fully control for the effects of comorbidities, psychotropic medication use, or smoking burden. In particular, cumulative smoking exposure (pack-years) and systemic medications such as corticosteroids could influence both brain structure and mood regulation. Antidepressants and other psychotropic drugs are known to modulate emotional processing and neural plasticity [47,48], which may have contributed to variability in the observed associations. Fourth, potential selection bias may have influenced our findings because three patients with COPD were excluded from the analysis due to missing questionnaire. These excluded participants might have differed systematically in disease severity, mental health status, or data quality, which could limit the representativeness of the final sample. Furthermore, the potential effects of antidepressant and anxiolytic medications should be acknowledged. Although we recorded medication use, the small sample size did not allow for separate analysis of medicated versus non-medicated participants. These drugs can influence both mood regulation and neural plasticity, potentially confounding the observed associations between brain structure and depressive symptoms. Fifth, smoking exposure was re-evaluated using pack-years rather than a categorical Likert scale to more precisely quantify cumulative burden. This approach allowed a finer discrimination of lifetime exposure, although statistical power remained limited to detect its independent effects on brain structure and mood. Chronic smoking has been associated with widespread structural and cognitive alterations [49,50], and its contribution to neural vulnerability in COPD warrants further investigation. Sixth, the cross-sectional design, limited region-of-interest approach, and lack of functional neuroimaging constrain causal inference and comprehensive network-level interpretation. Structural MRI alone cannot fully capture brain network dynamics or functional coupling relevant to mood regulation [51,52]. Larger, longitudinal, multimodal studies that incorporate both structural and functional measures—and use objective indicators of physical activity rather than self-reported data [53]—are warranted to validate and extend the present findings. Finally, this study employed a single-center design, which may limit the generalizability of the findings. The characteristics of patients treated at our institution, as well as institution-specific clinical practices, may not fully represent those of broader COPD populations. Future multi-center studies with larger and more diverse samples are needed to validate these results.



## Conclusions

This pilot study examined the relationships among the severity of airflow obstruction, physical activity, brain morphology, and mental health in patients with COPD using path analysis. Two distinct pathways, pulmonary and behavioral, were identified as potential mechanisms contributing to depressive symptoms. Specifically, reduced %FEV<sub>1</sub> and physical activity were each associated with atrophy in the genu of the corpus callosum and the postcentral gyrus, respectively, which in turn correlated with higher depressive symptoms. The model demonstrated a good fit, suggesting that these two brain regions may help explain the link between respiratory dysfunction and depression in COPD. Future studies should incorporate both structural and functional neuroimaging techniques to more precisely investigate how COPD-related systemic effects disrupt neural connectivity. Advanced imaging modalities, such as functional MRI and diffusion tensor imaging, could elucidate the relationship between localized structural changes and network-wide communication deficits. Additionally, therapeutic strategies aimed at reducing systemic inflammation and hypoxia may help mitigate brain damage and its psychological consequences in patients with COPD. Expanding the research scope to include related conditions, such as sleep disorders and adjustment disorders, may further enrich our understanding of the neuropsychiatric manifestations of COPD.

## Supporting information

**S1 Fig. Scatter plots illustrating the relationships among variables included in the path analysis.**  
(PDF)

## Author contributions

**Conceptualization:** Motoyasu Honma, Yuri Masaoka, Kentaro Okuda.

**Data curation:** Shunsuke Sakakura, Motoyasu Honma, Yuri Masaoka, Ryo Manabe, Kentaro Okuda, Masaki Yoshida.

**Formal analysis:** Shunsuke Sakakura, Motoyasu Honma, Yuri Masaoka, Ryo Manabe, Kentaro Okuda, Masaki Yoshida, Akira Yoshikawa, Misako Matsui, Daiki Shoji, Miku Kosuge, Shota Kosuge, Kenta Miyo, Masahiro Ida, Fumihiro Yamaguchi, Takuya Yokoe.

**Funding acquisition:** Motoyasu Honma, Masahiko Izumizaki.

**Investigation:** Yuri Masaoka, Ryo Manabe, Kentaro Okuda.

**Methodology:** Shunsuke Sakakura, Motoyasu Honma, Yuri Masaoka, Ryo Manabe, Kentaro Okuda, Masaki Yoshida, Akira Yoshikawa.

**Project administration:** Yuri Masaoka.

**Software:** Motoyasu Honma, Yuri Masaoka.

**Supervision:** Masahiko Izumizaki.

**Validation:** Motoyasu Honma, Masahiko Izumizaki.

**Visualization:** Motoyasu Honma.

**Writing – original draft:** Motoyasu Honma.

**Writing – review & editing:** Shunsuke Sakakura, Motoyasu Honma, Yuri Masaoka, Ryo Manabe, Kentaro Okuda, Masaki Yoshida, Akira Yoshikawa, Misako Matsui, Daiki Shoji, Miku Kosuge, Shota Kosuge, Kenta Miyo, Masahiro Ida, Fumihiro Yamaguchi, Takuya Yokoe, Masahiko Izumizaki.

## References

1. Global Initiative for Chronic Obstructive Lung Disease (GOLD) 2025 Report. Global strategy for the prevention, diagnosis and management of chronic obstructive pulmonary disease (2025 report). Geneva: Global Initiative for Chronic Obstructive Lung Disease; 2025.

2. Agustí A, Melén E, DeMeo DL, Breyer-Kohansal R, Faner R. Pathogenesis of chronic obstructive pulmonary disease: understanding the contributions of gene-environment interactions across the lifespan. *Lancet Respir Med*. 2022;10(5):512–24. [https://doi.org/10.1016/S2213-2600\(21\)00555-5](https://doi.org/10.1016/S2213-2600(21)00555-5) PMID: [35427533](#)
3. Sin DD, Doiron D, Agustí A, Anzueto A, Barnes PJ, Celli BR, et al. Air pollution and COPD: GOLD 2023 committee report. *Eur Respir J*. 2023;61(5):2202469. <https://doi.org/10.1183/13993003.02469-2022> PMID: [36958741](#)
4. Barnes PJ, Celli BR. Systemic manifestations and comorbidities of COPD. *Eur Respir J*. 2009;33(5):1165–85. <https://doi.org/10.1183/09031936.00128008> PMID: [19407051](#)
5. Safiri S, Carson-Chahhoud K, Noori M, Nejadghaderi SA, Sullman MJM, Ahmadian Heris J, et al. Burden of chronic obstructive pulmonary disease and its attributable risk factors in 204 countries and territories, 1990–2019: results from the Global Burden of Disease Study 2019. *BMJ*. 2022;378:e069679. <https://doi.org/10.1136/bmj-2021-069679> PMID: [35896191](#)
6. Siraj RA, McKeever TM, Gibson JE, Bolton CE. Incidence of depression and antidepressant prescription in patients with COPD: a large UK population-based cohort study. *Respir Med*. 2022;196:106804. <https://doi.org/10.1016/j.rmed.2022.106804> PMID: [35325742](#)
7. Blakemore A, Dickens C, Chew-Graham CA, Afzal CW, Tomenson B, Coventry PA, et al. Depression predicts emergency care use in people with chronic obstructive pulmonary disease: a large cohort study in primary care. *Int J Chron Obstruct Pulmon Dis*. 2019;14:1343–53. <https://doi.org/10.2147/COPD.S179109> PMID: [31388297](#)
8. Spilling CA, Bajaj M-PK, Burrage DR, Ruickbie S, Thai NJ, Baker EH, et al. Contributions of cardiovascular risk and smoking to chronic obstructive pulmonary disease (COPD)-related changes in brain structure and function. *Int J Chron Obstruct Pulmon Dis*. 2019;14:1855–66. <https://doi.org/10.2147/COPD.S213607> PMID: [31686798](#)
9. Yin M, Wang H, Hu X, Li X, Fei G, Yu Y. Patterns of brain structural alteration in COPD with different levels of pulmonary function impairment and its association with cognitive deficits. *BMC Pulm Med*. 2019;19(1):203. <https://doi.org/10.1186/s12890-019-0955-y> PMID: [31699064](#)
10. Esser RW, Stoeckel MC, Kirsten A, Watz H, Taube K, Lehmann K, et al. Structural brain changes in patients with COPD. *Chest*. 2016;149(2):426–34. <https://doi.org/10.1378/chest.15-0027> PMID: [26203911](#)
11. Zhang H, Wang X, Lin J, Sun Y, Huang Y, Yang T, et al. Reduced regional gray matter volume in patients with chronic obstructive pulmonary disease: a voxel-based morphometry study. *AJNR Am J Neuroradiol*. 2013;34(2):334–9. <https://doi.org/10.3174/ajnr.A3235> PMID: [22859277](#)
12. Schottelkotte KM, Crone SA. Forebrain control of breathing: anatomy and potential functions. *Front Neurol*. 2022;13:1041887. <https://doi.org/10.3389/fneur.2022.1041887> PMID: [36388186](#)
13. Cabibel V, Héraud N, Perrey S, Oliver N, Alexandre F, Varray A. Is bilateral corticospinal connectivity impaired in patients with chronic obstructive pulmonary disease? *J Physiol*. 2020;598(20):4591–602. <https://doi.org/10.1113/JP279560> PMID: [32697330](#)
14. Zhang J, Chen J, Yu Q, Fan C, Zhang R, Lin J, et al. Alteration of spontaneous brain activity in COPD patients. *Int J Chron Obstruct Pulmon Dis*. 2016;11:1713–9. <https://doi.org/10.2147/COPD.S110089> PMID: [27555761](#)
15. Liang J, Yu Q, Chen L, Li Z, Liu Y, Qiu Y, et al. Gray matter and cognitive alteration related to chronic obstructive pulmonary disease patients: combining ALE meta-analysis and MACM analysis. *Brain Imaging Behav*. 2025;19(1):204–17. <https://doi.org/10.1007/s11682-024-00946-y> PMID: [39388006](#)
16. Kubota S, Masaoka Y, Sugiyama H, Yoshida M, Yoshikawa A, Koiwa N, et al. Hippocampus and parahippocampus volume reduction associated with impaired olfactory abilities in subjects without evidence of cognitive decline. *Front Hum Neurosci*. 2020;14:556519. <https://doi.org/10.3389/fnhum.2020.556519> PMID: [33192392](#)
17. Craig CL, Marshall AL, Sjöström M, Bauman AE, Booth ML, Ainsworth BE, et al. International physical activity questionnaire: 12-country reliability and validity. *Med Sci Sports Exerc*. 2003;35(8):1381–95. <https://doi.org/10.1249/01.MSS.0000078924.61453.FB> PMID: [12900694](#)
18. Jones PW, Harding G, Berry P, Wiklund I, Chen W-H, Kline Leidy N. Development and first validation of the COPD Assessment Test. *Eur Respir J*. 2009;34(3):648–54. <https://doi.org/10.1183/09031936.00102509> PMID: [19720809](#)
19. Matsudaira T, Igarashi H, Kikuchi H, Kano R, Mitoma H, Ohuchi K, et al. Factor structure of the Hospital Anxiety and Depression Scale in Japanese psychiatric outpatient and student populations. *Health Qual Life Outcomes*. 2009;7:42. <https://doi.org/10.1186/1477-7525-7-42> PMID: [19445722](#)
20. Fischl B. FreeSurfer. *Neuroimage*. 2012;62(2):774–81. <https://doi.org/10.1016/j.neuroimage.2012.01.021> PMID: [22248573](#)
21. Fischl B, Salat DH, Busa E, Albert M, Dieterich M, Haselgrove C, et al. Whole brain segmentation: automated labeling of neuroanatomical structures in the human brain. *Neuron*. 2002;33(3):341–55. [https://doi.org/10.1016/s0896-6273\(02\)00569-x](https://doi.org/10.1016/s0896-6273(02)00569-x) PMID: [11832223](#)
22. Dale AM, Fischl B, Sereno MI. Cortical surface-based analysis. I. Segmentation and surface reconstruction. *Neuroimage*. 1999;9(2):179–94. <https://doi.org/10.1006/nimg.1998.0395> PMID: [9931268](#)
23. Fischl B, Dale AM. Measuring the thickness of the human cerebral cortex from magnetic resonance images. *Proc Natl Acad Sci U S A*. 2000;97(20):11050–5. <https://doi.org/10.1073/pnas.200033797> PMID: [10984517](#)
24. Fischl B, Sereno MI, Dale AM. Cortical surface-based analysis. II: inflation, flattening, and a surface-based coordinate system. *Neuroimage*. 1999;9(2):195–207. <https://doi.org/10.1006/nimg.1998.0396> PMID: [9931269](#)
25. Fischl B, van der Kouwe A, Destrieux C, Halgren E, Ségonne F, Salat DH, et al. Automatically parcellating the human cerebral cortex. *Cereb Cortex*. 2004;14(1):11–22. <https://doi.org/10.1093/cercor/bhg087> PMID: [14654453](#)

26. Desikan RS, Ségonne F, Fischl B, Quinn BT, Dickerson BC, Blacker D, et al. An automated labeling system for subdividing the human cerebral cortex on MRI scans into gyral based regions of interest. *Neuroimage*. 2006;31(3):968–80. <https://doi.org/10.1016/j.neuroimage.2006.01.021> PMID: [16530430](#)
27. Destrieux C, Fischl B, Dale A, Halgren E. Automatic parcellation of human cortical gyri and sulci using standard anatomical nomenclature. *Neuroimage*. 2010;53(1):1–15. <https://doi.org/10.1016/j.neuroimage.2010.06.010> PMID: [20547229](#)
28. Mathalon DH, Sullivan EV, Rawles JM, Pfefferbaum A. Correction for head size in brain-imaging measurements. *Psychiatry Res*. 1993;50(2):121–39. [https://doi.org/10.1016/0925-4927\(93\)90016-b](https://doi.org/10.1016/0925-4927(93)90016-b) PMID: [8378488](#)
29. Lee S, Pyun S-B, Tae W-S. Reduced axial diffusivity and increased mode and T2 signals in cerebral white matter of chronic obstructive pulmonary disease using tract-based spatial statistics. *Neuroradiology*. 2019;61(7):795–801. <https://doi.org/10.1007/s00234-019-02178-0> PMID: [30712138](#)
30. Kurtoğlu E, Payas A, Düz S, Arık M, Uçar İ, Tokmak TT, et al. Analysis of changes in brain morphological structure of taekwondo athletes by diffusion tensor imaging. *J Chem Neuroanat*. 2023;129:102250. <https://doi.org/10.1016/j.jchemneu.2023.102250> PMID: [36791923](#)
31. Lenhart L, Nagele M, Steiger R, Beliveau V, Skalla E, Zamarian L, et al. Occupation-related effects on motor cortex thickness among older, cognitive healthy individuals. *Brain Struct Funct*. 2021;226(4):1023–30. <https://doi.org/10.1007/s00429-021-02223-w> PMID: [33555422](#)
32. Dodd JW, Chung AW, van den Broek MD, Barrick TR, Charlton RA, Jones PW. Brain structure and function in chronic obstructive pulmonary disease: a multimodal cranial magnetic resonance imaging study. *Am J Respir Crit Care Med*. 2012;186(3):240–5. <https://doi.org/10.1164/rccm.201202-0355OC> PMID: [22652026](#)
33. Gunes A, Sigirli D, Ercan I, Turan Ozdemir S, Durmus Y, Yildiz T. Evaluation of the corpus callosum shape in patients with obstructive sleep apnea. *Sleep Breath*. 2022;26(3):1201–7. <https://doi.org/10.1007/s11325-021-02502-0> PMID: [34665410](#)
34. Sweet LH, Jerskey BA, Aloia MS. Default network response to a working memory challenge after withdrawal of continuous positive airway pressure treatment for obstructive sleep apnea. *Brain Imaging Behav*. 2010;4(2):155–63. <https://doi.org/10.1007/s11682-010-9095-y> PMID: [20502992](#)
35. Acciarresi M. Agnosia, apraxia, callosal disconnection and other specific cognitive disorders. *Front Neurol Neurosci*. 2012;30:75–8. <https://doi.org/10.1159/000333419> PMID: [22377868](#)
36. Caruana GF, Carruthers SP, Berk M, Rossell SL, Van Rheenen TE. To what extent does white matter map to cognition in bipolar disorder? A systematic review of the evidence. *Prog Neuropsychopharmacol Biol Psychiatry*. 2024;128:110868. <https://doi.org/10.1016/j.pnpbp.2023.110868> PMID: [37797735](#)
37. Wingbermühle E, Theunissen H, Verhoeven WMA, Kessels RPC, Egger JIM. The neurocognition of alexithymia: evidence from neuropsychological and neuroimaging studies. *Acta Neuropsychiatr*. 2012;24(2):67–80. <https://doi.org/10.1111/j.1601-5215.2011.00613.x> PMID: [26952949](#)
38. Zhang J, Tang Y, Sun Y, Xu Y, Pang L, Li J, et al. Corpus callosum infarction with cognitive dysfunction: two case reports and literature review. *Neuropsychiatr Dis Treat*. 2018;14:511–5. <https://doi.org/10.2147/NDT.S155487> PMID: [29491710](#)
39. Zhang Q, Zhang A, Zhao Z, Li Q, Hu Y, Huang X, et al. Temporoparietal structural-functional coupling abnormalities in drug-naïve first-episode major depressive disorder. *Prog Neuropsychopharmacol Biol Psychiatry*. 2025;136:111211. <https://doi.org/10.1016/j.pnpbp.2024.111211> PMID: [39642975](#)
40. Chen Z, Peng W, Sun H, Kuang W, Li W, Jia Z, et al. High-field magnetic resonance imaging of structural alterations in first-episode, drug-naïve patients with major depressive disorder. *Transl Psychiatry*. 2016;6(11):e942. <https://doi.org/10.1038/tp.2016.209> PMID: [27824357](#)
41. Jha SS, Kumar M, Agrawal PK, Thakur DK. Osteoporosis in Asthma and COPD. *Indian J Orthop*. 2023;57(Suppl 1):200–8. <https://doi.org/10.1007/s43465-023-01048-5> PMID: [38107800](#)
42. Corlateanu A, Covantsev S, Iasabash O, Lupu L, Avadanii M, Siafakas N. Chronic obstructive pulmonary disease and depression-the vicious mental cycle. *Healthcare (Basel)*. 2025;13(14):1699. <https://doi.org/10.3390/healthcare13141699> PMID: [40724725](#)
43. Wolf EJ, Harrington KM, Clark SL, Miller MW. Sample size requirements for structural equation models: an evaluation of power, bias, and solution propriety. *Educ Psychol Meas*. 2013;76(6):913–34. <https://doi.org/10.1177/0013164413495237> PMID: [25705052](#)
44. Fukatsu-Chikumoto A, Hirano T, Takahashi S, Ishida T, Yasuda K, Donishi T, et al. Correlation between frailty and reduction in cortical thickness in patients with chronic obstructive pulmonary disease. *Sci Rep*. 2024;14(1):6106. <https://doi.org/10.1038/s41598-024-53933-0> PMID: [38480723](#)
45. Rolls ET. The orbitofrontal cortex and emotion in health and disease, including depression. *Neuropsychologia*. 2019;128:14–43. <https://doi.org/10.1016/j.neuropsychologia.2017.09.021> PMID: [28951164](#)
46. Takamura T, Hanakawa T. Clinical utility of resting-state functional connectivity magnetic resonance imaging for mood and cognitive disorders. *J Neural Transm (Vienna)*. 2017;124(7):821–39. <https://doi.org/10.1007/s00702-017-1710-2> PMID: [28337552](#)
47. Harmer CJ. Serotonin and emotional processing: does it help explain antidepressant drug action? *Neuropharmacology*. 2008;55(6):1023–8. <https://doi.org/10.1016/j.neuropharm.2008.06.036> PMID: [18634807](#)
48. Alexopoulos GS. Mechanisms and treatment of late-life depression. *Focus (Am Psychiatr Publ)*. 2021;19(3):340–54. <https://doi.org/10.1176/appi.focus.19304> PMID: [34690604](#)
49. Durazzo TC, Meyerhoff DJ. Neurobiological and neurocognitive effects of chronic cigarette smoking and alcoholism. *Front Biosci*. 2007;12:4079–100. <https://doi.org/10.2741/2373> PMID: [17485360](#)
50. Fritz H-C, Wittfeld K, Schmidt CO, Domin M, Grabe HJ, Hegenscheid K, et al. Current smoking and reduced gray matter volume—a voxel-based morphometry study. *Neuropsychopharmacology*. 2014;39(11):2594–600. <https://doi.org/10.1038/npp.2014.112> PMID: [24832823](#)

51. Liu Z-Q, Vázquez-Rodríguez B, Spreng RN, Bernhardt BC, Betzel RF, Misić B. Time-resolved structure-function coupling in brain networks. *Commun Biol*. 2022;5(1):532. <https://doi.org/10.1038/s42003-022-03466-x> PMID: [35654886](https://pubmed.ncbi.nlm.nih.gov/35654886/)
52. Litwińczuk MC, Muhlert N, Cloutman L, Trujillo-Barreto N, Woollams A. Combination of structural and functional connectivity explains unique variation in specific domains of cognitive function. *Neuroimage*. 2022;262:119531. <https://doi.org/10.1016/j.neuroimage.2022.119531> PMID: [35931312](https://pubmed.ncbi.nlm.nih.gov/35931312/)
53. Prince SA, Adamo KB, Hamel ME, Hardt J, Connor Gorber S, Tremblay M. A comparison of direct versus self-report measures for assessing physical activity in adults: a systematic review. *Int J Behav Nutr Phys Act*. 2008;5:56. <https://doi.org/10.1186/1479-5868-5-56> PMID: [18990237](https://pubmed.ncbi.nlm.nih.gov/18990237/)
